# Supplementary material
Source: publisher site journal article supplement (https://www.dovepress.com/article/301597)
Supplement: Supplementary file 1 [file get_supplementary_file.php]

**A**

Figure S1: *In-vitro* drug release of RP suspension and ethosomal RP (A) F1-F8, (B) F9-F15.

**A**

Figure S2: *Ex-vivo* permeation of RP suspension and ethosomal RP; (A) F1-F8, (B) F9-F15.

*Figure S3: in-vitro* drug release of RP suspension and ethosomal RP hydrogel formulations.

Figure S4: EX-vivo permeation RP suspension and ethosomal RP hydrogel formulation.

Figure S5: % drug released from control gel and optimized ethosomal hydrogel of RP.


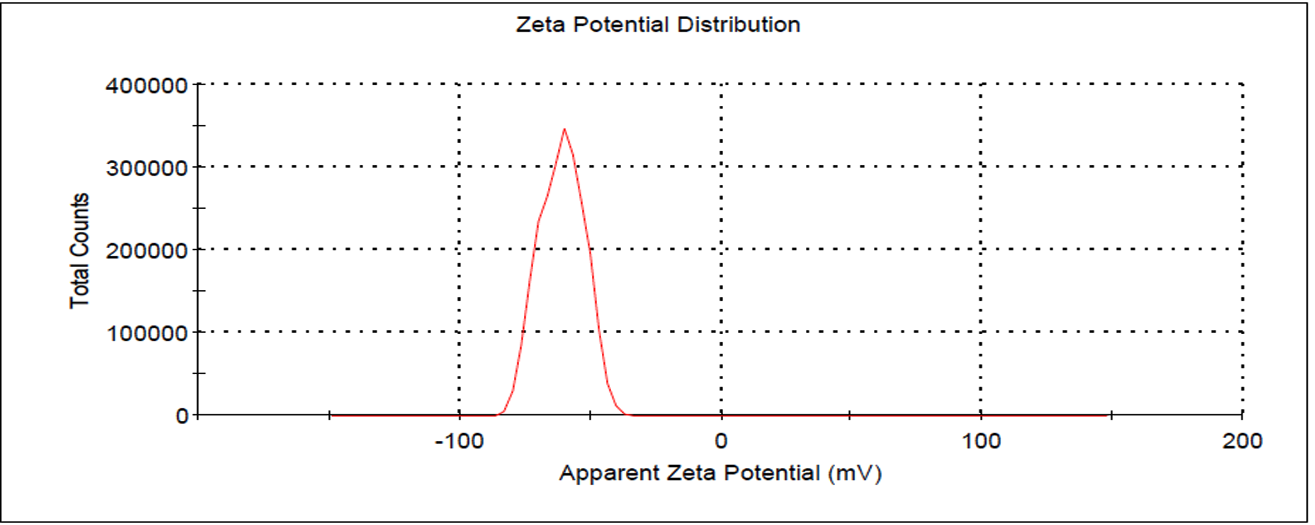


Figure S6: Zeta potential distribution curve of the optimized ethosomal RP formulation.


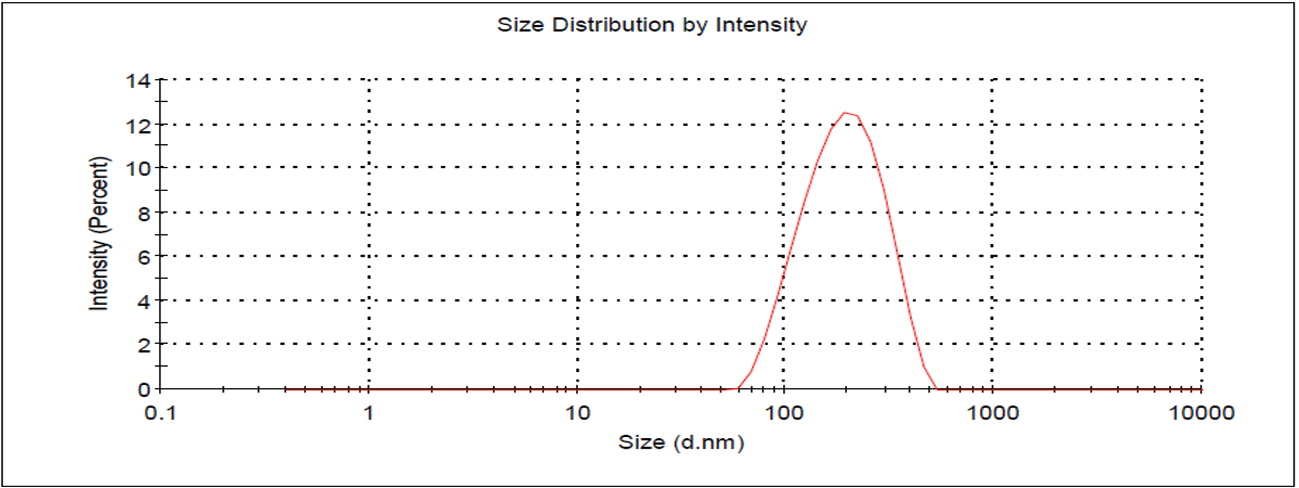


Figure S7: Particle size distribution curve of the optimized ethosomal RP formulation.
